# Supplementary material for: A chromo-fluorogenic probe for detecting water traces in aprotic solvents based on C2-symmetry dianthrimide–hydroxide complexes: experimental and theoretical studies
Source: Royal Society of Chemistry journal article supplement (doi:10.1039/d0dt03630g), 2020-11-26
Supplement: d0dt03630g1.pdf [file d0dt03630g1.pdf]

## A chromo-fluorogenic probe for signaling water traces in aprotic solvents, based on a $C_2$ -symmetry dianthrimide - hydroxide complexes: Experimental and theoretical studies

Veikko Uahengo\*, Johannes Naimhwaka

Department of Chemistry and Biochemistry, University of Namibia, 340 Mandume Ndemufayo Avenue, Windhoek, 9000, Namibia

\*Corresponding author. Tel/fax: +264 61 206 3465. E-mail address: vuahengo@unam.na or vuahengo@gmail.com (V. Uahengo)

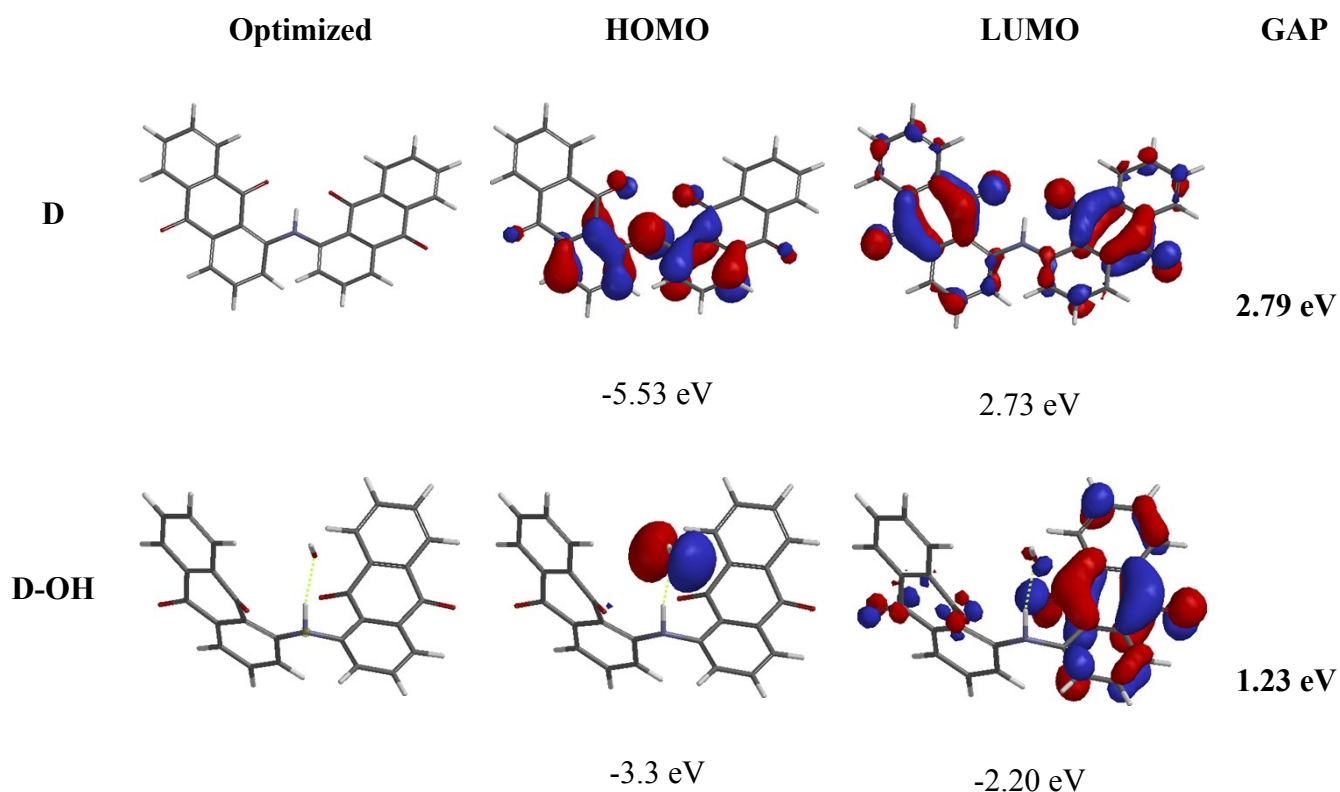

**Figure S1:** Excited state HOMO and LUMO diagrams of **D** and **D-OH** in DMSO
